# Supplementary figures and images for: Human Periodontal Ligament Stem Cells Response to Titanium Implant Surface: Extracellular Matrix Deposition
Source: MDPI journal article supplement (doi:10.3390/biology10090931), 2021-09-18

Fibronectin

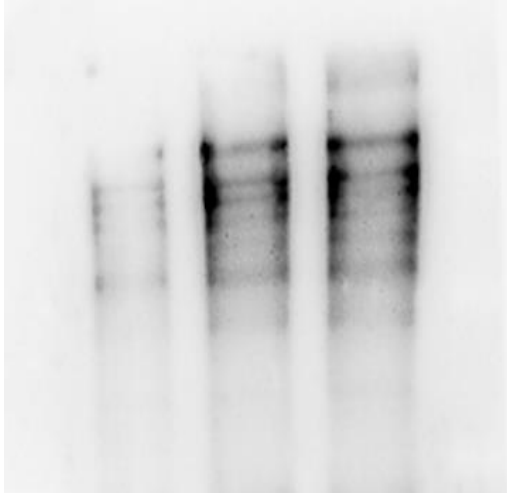

RUNX2

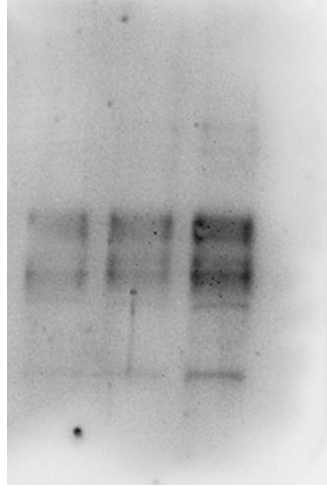

Beta actin

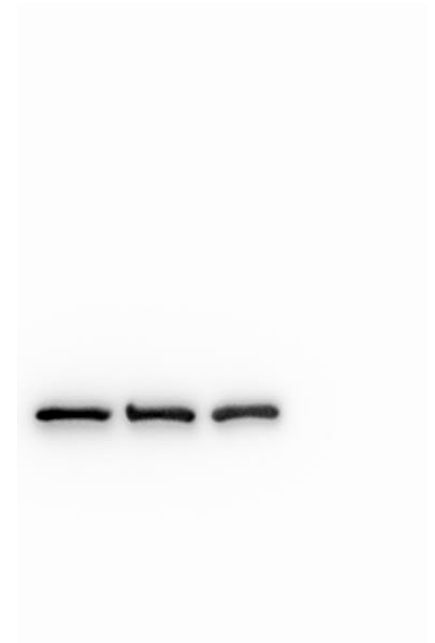

N cadherin

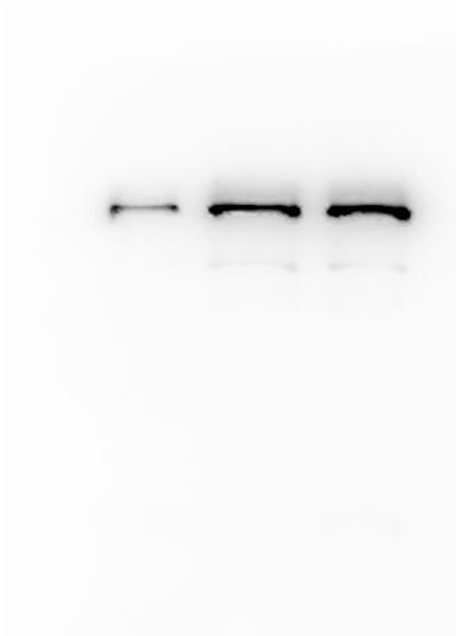

Laminin

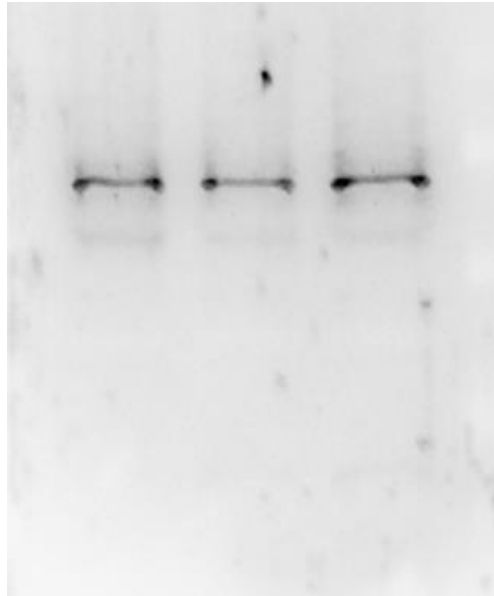

Supplement: s1 [file s1]
